# Supplementary material for: Platelet mediated TRAIL delivery for efficiently targeting circulating tumor cells
Source: Royal Society of Chemistry journal article supplement (doi:10.1039/d0na00271b), 2020-01-01
Supplement: d0na00271b1.pdf [file d0na00271b1.pdf]

### Supplementary Materials:

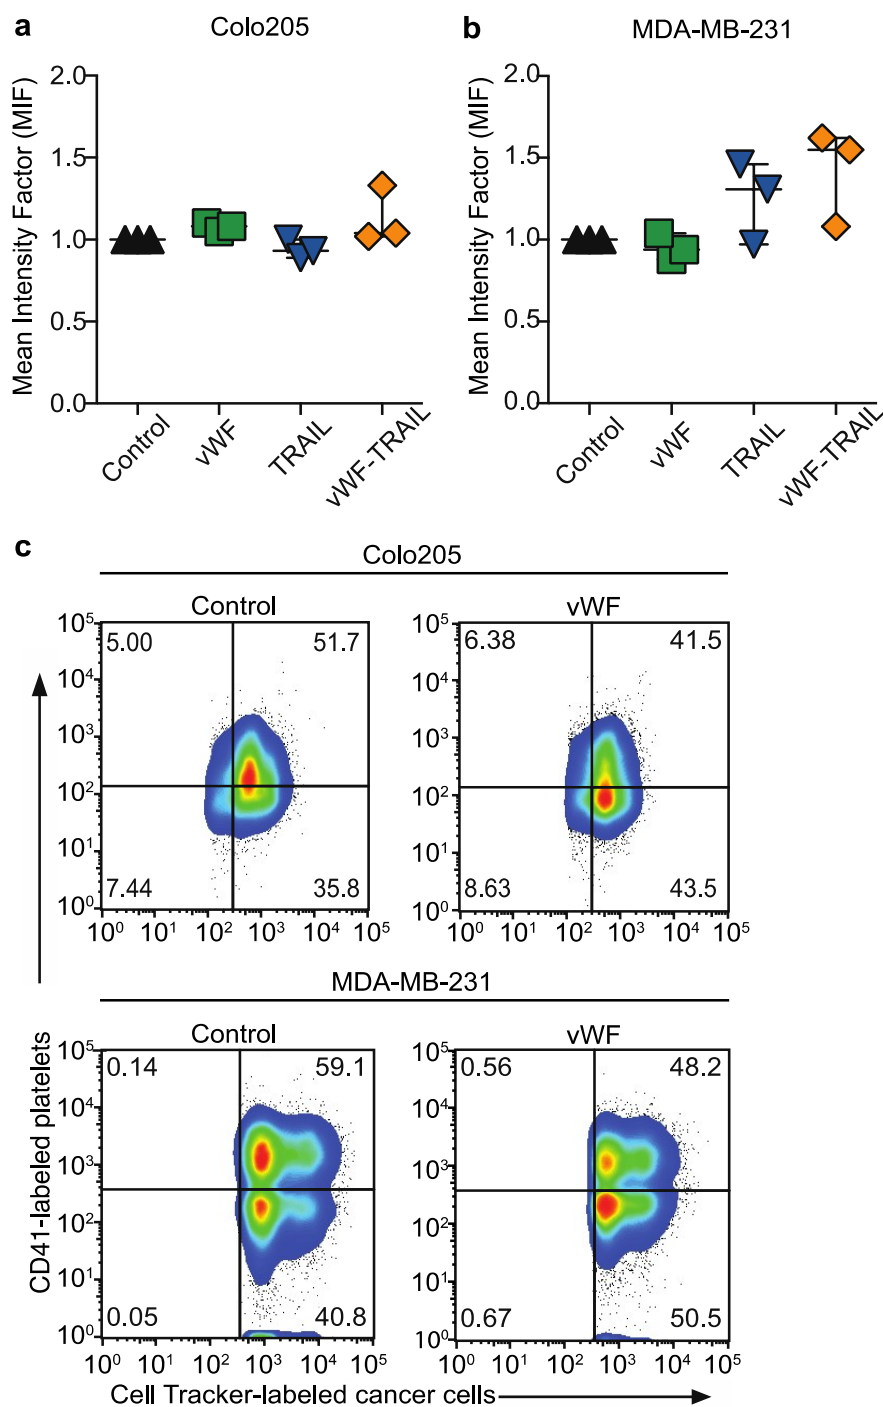

**Supplementary figure 1S: TRAIL-coated platelets do not affect platelet-tumor cell interactions.** (A-B) Scatter dot plot represents the mean fluorescence intensity (MIF) of CD41-labeled platelets adhered to treated Colo205 and treated MDA-MB-231 cells with the functionalized liposomes under shear conditions normalized to control liposomes. No significant difference ( $0.2668 < P < 0.7687$ ) was found in platelet adhesion to tumor cells, as determined using one-way ANOVA. (C) Flow cytometry density plots display the percentage of CD41-labeled platelets adhered to Colo205 and MDA-MB-231 cells under shear conditions treated with the control and vWF liposomes (Upper right quadrant).
